# Supplementary material
Source: publisher site journal article supplement (https://www.degruyterbrill.com/publication/isbn/9783050056043/downloadAsset/9783050056043_Buchinformation.pdf)
Supplement: Supplementary file 1 [file 9783050056043_Buchinformation.pdf]

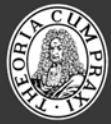

# Akademie Verlag

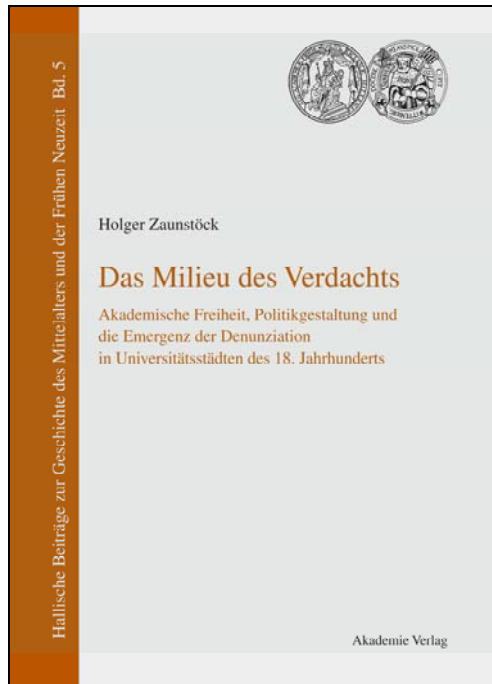

Holger Zaunstock

## Das Milieu des Verdachts

Akademische Freiheit, Politikgestaltung und die  
Emergenz der Denunziation in Universitätsstädten des  
18. Jahrhunderts

*Hallische Beiträge zur Geschichte des Mittelalters und  
der Frühen Neuzeit, Band 5*

2010. 410 S. – 8 s/w-Abb. – 170 x 240 mm

Festeinband, € 79,80

ISBN 978-3-05-004651-8

Die studentische Lebenswelt in Universitätsstädten der Frühen Neuzeit ist ein bislang nicht untersuchtes Feld im Rahmen der Forschungen zur Denunziation.

Holger Zaunstock erforscht und vergleicht erstmals auf empirischer Basis die Emergenz der Denunziation in mehreren Universitätsstädten zwischen dem Ende des 17. Jahrhunderts und dem Epochenumbruch im frühen 19. Jahrhundert: Wie und warum wird Denunziationsverhalten ermöglicht, wie sind die Menschen damit umgegangen und welche Verhaltensweisen wurden entwickelt?

Die Untersuchung stellt die Merkmale denunziatorischen Verhaltens in sozialen, politischen und mentalen Handlungsfeldern dar. Auf diese Weise wird ein Bild des Denunziationsverhaltens in der Frühen Neuzeit entworfen, das zahlreiche weitergehende Anknüpfungspunkte im Blick auf spätere politische Kulturen zur Verfügung stellt.
